# Supplementary material
Source: Springer Nature journal article supplement (https://www.springermedizin.de/resource/supplementary/12884_2012_564_MOESM1_ESM.pdf/9458064)
Supplement: MOESM1 [file 9458064]

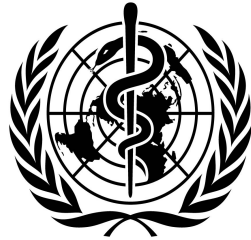

# World Health Organization

## PREGNANCY REGISTRY

Subject's initials: \_\_\_\_\_

Clinic name: \_\_\_\_\_

Clinic ID: \_\_\_\_\_

Registry ID: \_\_\_\_\_

|                                            |                                                                    |                           |
|--------------------------------------------|--------------------------------------------------------------------|---------------------------|
| <b>Informed consent date</b>               | _____                                                              |                           |
| <b>First date of last menstrual period</b> | _____ or _____ or NK<br>dd mm yy                      how long ago |                           |
| <b>Expected date of delivery</b>           | _____                                                              |                           |
| <b>Actual date of delivery</b>             | _____                                                              |                           |
|                                            | <b>Scheduled Visit Dates</b>                                       | <b>Actual Visit Dates</b> |
| <b>Visit 1</b>                             |                                                                    |                           |
| <b>Visit 2</b>                             |                                                                    |                           |
| <b>Visit 3</b>                             |                                                                    |                           |
| <b>Visit 4</b>                             |                                                                    |                           |
| <b>Visit 5</b>                             |                                                                    |                           |
| <b>Visit 6</b>                             |                                                                    |                           |
| <b>Visit 7</b>                             |                                                                    |                           |

# Pregnancy registry

## Ante-natal data-sheet

Clinic \_\_\_\_\_

Registry ID: \_\_\_\_\_

Clinic ID: \_\_\_\_\_

### Visit 1

|                                |                        |                                  |                                                |
|--------------------------------|------------------------|----------------------------------|------------------------------------------------|
| Visit date: _____<br>dd mmm yy | Assessor's name: _____ | Assessor's title/position: _____ | Assessor's signature: _____                    |
| Age: _____ years               | Height: _____ cm       | Weight: _____ kg                 | Mid upper arm circumference: _____ cm          |
| Fundal height: _____ cm        | NA                     | Fetal heart sound? Yes No NA     | Ultrasound? Yes ( <i>complete 'tests'</i> ) No |

|                                                                                                           |                                                         |
|-----------------------------------------------------------------------------------------------------------|---------------------------------------------------------|
| Gravida (Total number of pregnancies, including the current pregnancy): _____                             | Para (Number of liveborn and stillborn children): _____ |
| How many of your children born alive have died?                                                           | NA 0 1 2 3 4 5 6 7+                                     |
| How many previous multiple pregnancies have you had?                                                      | NA 0 1 2 3 4 5 6 7+                                     |
| How many stillborn children have you had?                                                                 | NA 0 1 2 3 4 5 6 7+                                     |
| How many miscarriages or abortions have you had?                                                          | NA 0 1 2 3 4 5 6 7+                                     |
| Are you related by birth to the father of this child? Yes, how? _____                                     | No NK                                                   |
| Were any of your babies born with deformities? NA No Yes (please provide details for each baby if known): |                                                         |
| Were you or any of your family members born with deformities? No Yes                                      |                                                         |
| If <b>yes</b> , what is your relationship to this person: self mother father sibling child's father       |                                                         |
| Description:                                                                                              |                                                         |
| Do you smoke? Yes (cigarettes/day?) No                                                                    | Do you drink alcohol? Yes (drinks/week?) No             |
| Do you use illegal drugs? Yes ( <i>complete "treatments"</i> ) No                                         | NK                                                      |

I will now ask you about your health. Please tell me about treatments you have taken **during (and just before) your pregnancy**. Please include all treatments you have taken, even if you think they are not related to your pregnancy. Please consider anything a health worker, traditional healer, birth attendant, shop-keeper, relative or friend has given or sold you. Reporting treatments will not harm or cause trouble to you or anyone else.

|                                                                                                                                                                                                                                    |                |    |            |                     |          |         |     |          |                  |      |
|------------------------------------------------------------------------------------------------------------------------------------------------------------------------------------------------------------------------------------|----------------|----|------------|---------------------|----------|---------|-----|----------|------------------|------|
| <b>Have you had any of the following medical problems?</b> ( <i>Circle any condition reported by the participant or circle 'None'. If participant reports an illness, record details in 'medical history' section opposite.</i> ): |                |    |            |                     |          |         |     |          |                  |      |
| Epilepsy                                                                                                                                                                                                                           | Genital Herpes | TB | Gonorrhoea | High blood pressure | Diabetes | Rubella | HIV | Syphilis | Other infections | None |
| <b>If you have had any of these medical problems, have you taken any treatments for them?</b> ( <i>If yes, record treatments reported in "treatments" section opposite.</i> ): Yes No NA                                           |                |    |            |                     |          |         |     |          |                  |      |

### During this pregnancy, or within a month before you became pregnant, have you:

(*For questions below, write any conditions, treatments, and tests in the "medical history", "treatments", "test results" section opposite.*)

|                                                                                                                                |     |    |    |
|--------------------------------------------------------------------------------------------------------------------------------|-----|----|----|
| Had malaria?                                                                                                                   | Yes | No | NK |
| Taken any treatments to prevent malaria?                                                                                       | Yes | No | NK |
| Had any fever other than malaria?                                                                                              | Yes | No | NK |
| Had any vaccines?                                                                                                              | Yes | No | NK |
| Had any blood transfusions?                                                                                                    | Yes | No | NK |
| Had any other injections?                                                                                                      | Yes | No | NK |
| Had any vaginal bleeding?                                                                                                      | Yes | No | NK |
| Had any other condition (apart from those mentioned above)?                                                                    | Yes | No | NK |
| Have you taken any traditional or herbal medicines?                                                                            | Yes | No | NK |
| Taken any other treatment, including routine treatments (e.g. folic acid, iron supplements, multivitamins, deworming tablets)? | Yes | No | NK |
| Had any tests at a clinic (apart from an ultrasound)?                                                                          | Yes | No | NK |

### For midwife to complete:

(*For questions below, write any treatments and tests prescribed in "medical history" and "test results" section opposite*)

|                                                                                  |     |    |
|----------------------------------------------------------------------------------|-----|----|
| At the clinic today, will this patient be prescribed one or more treatments?     | Yes | No |
| At the clinic today, will this patient be given or prescribed one or more tests? | Yes | No |

|                                                             |                                                                 |                                                                  |                                 |                                                               |
|-------------------------------------------------------------|-----------------------------------------------------------------|------------------------------------------------------------------|---------------------------------|---------------------------------------------------------------|
| Visit 2                                                     |                                                                 |                                                                  | Registry ID                     | Clinic ID                                                     |
| Visit date: _____<br>dd mmm yy                              | Assessor's name: _____                                          | Assessor's title/position: _____                                 | Assessor's signature: _____     |                                                               |
| Weight: _____ kg                                            | Mid upper arm circ.: _____ cm                                   | Fundal height: _____ cm NA                                       | Fetal heart sound?<br>Yes No NA | Ultrasound done (since visit 1)?<br>Yes (complete "tests") No |
| Since visit 1, have you smoked?<br>No Yes (cigarettes/day): | Since visit 1, have you drunk alcohol?<br>No Yes (drinks/week): | Since visit 1, have you used illegal drugs?<br>No Yes (specify): |                                 |                                                               |

**Since your last visit ...**

(For questions below, write any conditions, treatments, tests in the "medical history", "treatments", "test results" section opposite)

|                                                                                                                                           |     |    |    |
|-------------------------------------------------------------------------------------------------------------------------------------------|-----|----|----|
| Have you had malaria?                                                                                                                     | Yes | No | NK |
| Have you taken any treatments to prevent malaria?                                                                                         | Yes | No | NK |
| Have you had any fever other than malaria?                                                                                                | Yes | No | NK |
| Have you had any vaccines?                                                                                                                | Yes | No | NK |
| Have you had any blood transfusions?                                                                                                      | Yes | No | NK |
| Have you had any other injections?                                                                                                        | Yes | No | NK |
| Have you had any other condition (apart from malaria and fever)?                                                                          | Yes | No | NK |
| Have you taken any traditional or herbal medicines?                                                                                       | Yes | No | NK |
| Have you taken any other treatments (including routine treatments - e.g. folic acid, iron supplements, multivitamins, deworming tablets)? | Yes | No | NK |
| Have you had any tests at a clinic (apart from an ultrasound)?                                                                            | Yes | No | NK |

**For midwife to complete:**

(For questions below, write any treatments and tests prescribed in "medical history" and "test results" section opposite)

|                                                                                  |     |    |
|----------------------------------------------------------------------------------|-----|----|
| At the clinic today, will this patient be prescribed one or more treatments?     | Yes | No |
| At the clinic today, will this patient be given or prescribed one or more tests? | Yes | No |

|                                                             |                                                                 |                                                                  |                                 |                                                               |
|-------------------------------------------------------------|-----------------------------------------------------------------|------------------------------------------------------------------|---------------------------------|---------------------------------------------------------------|
| Visit 3                                                     |                                                                 |                                                                  | Registry ID                     | Clinic ID                                                     |
| Visit date: _____<br>dd mmm yy                              | Assessor's name: _____                                          | Assessor's title/position: _____                                 | Assessor's signature: _____     |                                                               |
| Weight: _____ kg                                            | Mid upper arm circ.: _____ cm                                   | Fundal height: _____ cm NA                                       | Fetal heart sound?<br>Yes No NA | Ultrasound done (since visit 2)?<br>Yes (complete "tests") No |
| Since visit 2, have you smoked?<br>No Yes (cigarettes/day): | Since visit 2, have you drunk alcohol?<br>No Yes (drinks/week): | Since visit 2, have you used illegal drugs?<br>No Yes (specify): |                                 |                                                               |

**Since your last visit ...**

(For questions below, write any conditions, treatments, tests in the "medical history", "treatments", "test results" section opposite)

|                                                                                                                                           |     |    |    |
|-------------------------------------------------------------------------------------------------------------------------------------------|-----|----|----|
| Have you had malaria?                                                                                                                     | Yes | No | NK |
| Have you taken any treatments to prevent malaria?                                                                                         | Yes | No | NK |
| Have you had any fever other than malaria?                                                                                                | Yes | No | NK |
| Have you had any vaccines?                                                                                                                | Yes | No | NK |
| Have you had any blood transfusions?                                                                                                      | Yes | No | NK |
| Have you had any other injections?                                                                                                        | Yes | No | NK |
| Have you had any other condition (apart from malaria and fever)?                                                                          | Yes | No | NK |
| Have you taken any traditional or herbal medicines?                                                                                       | Yes | No | NK |
| Have you taken any other treatments (including routine treatments - e.g. folic acid, iron supplements, multivitamins, deworming tablets)? | Yes | No | NK |
| Have you had any tests at a clinic (apart from an ultrasound)?                                                                            | Yes | No | NK |

**For midwife to complete:**

(For questions below, write any treatments and tests prescribed in "medical history", "treatments" and "test results" section opposite)

|                                                                                  |     |    |
|----------------------------------------------------------------------------------|-----|----|
| At the clinic today, will this patient be prescribed one or more treatments?     | Yes | No |
| At the clinic today, will this patient be given or prescribed one or more tests? | Yes | No |

|                                                             |                               |                                                                 |                              |                                                                  |                                                               |
|-------------------------------------------------------------|-------------------------------|-----------------------------------------------------------------|------------------------------|------------------------------------------------------------------|---------------------------------------------------------------|
| Visit 4                                                     |                               |                                                                 |                              | Registry ID: _____                                               | Clinic ID: _____                                              |
| Visit date: _____<br>dd mmm yy                              | Assessor's name: _____        | Assessor's title/position: _____                                | Assessor's signature: _____  |                                                                  |                                                               |
| Weight: _____ kg                                            | Mid upper arm circ.: _____ cm | Fundal height: _____ cm NA                                      | Fetal heart sound? Yes No NA |                                                                  | Ultrasound done (since visit 3)?<br>Yes (complete "tests") No |
| Since visit 3, have you smoked?<br>No Yes (cigarettes/day): |                               | Since visit 3, have you drunk alcohol?<br>No Yes (drinks/week): |                              | Since visit 3, have you used illegal drugs?<br>No Yes (specify): |                                                               |

**Since your last visit ...**

*(For questions below, write any conditions, treatments, tests in the "medical history", "treatments", "test results" section opposite)*

|                                                                     |     |    |    |
|---------------------------------------------------------------------|-----|----|----|
| Have you had malaria?                                               | Yes | No | NK |
| Have you taken any treatments to prevent malaria?                   | Yes | No | NK |
| Have you had any fever other than malaria?                          | Yes | No | NK |
| Have you had any vaccines?                                          | Yes | No | NK |
| Have you had any blood transfusions?                                | Yes | No | NK |
| Have you had any other injections?                                  | Yes | No | NK |
| Have you had any other condition (apart from malaria and fever)?    | Yes | No | NK |
| Have you taken any traditional or herbal medicines?                 | Yes | No | NK |
| Have you taken any other treatments (including routine treatments)? | Yes | No | NK |
| Have you had any tests at a clinic (apart from an ultrasound)?      | Yes | No | NK |

**For midwife to complete:**

*(For questions below, write any treatments and tests prescribed in "medical history" and "test results" section opposite)*

|                                                                                  |     |    |
|----------------------------------------------------------------------------------|-----|----|
| At the clinic today, will this patient be prescribed one or more treatments?     | Yes | No |
| At the clinic today, will this patient be given or prescribed one or more tests? | Yes | No |

|                                                             |                               |                                                                 |                              |                                                                  |                                                               |
|-------------------------------------------------------------|-------------------------------|-----------------------------------------------------------------|------------------------------|------------------------------------------------------------------|---------------------------------------------------------------|
| Visit 5                                                     |                               |                                                                 |                              | Registry ID: _____                                               | Clinic ID: _____                                              |
| Visit date: _____<br>dd mmm yy                              | Assessor's name: _____        | Assessor's title/position: _____                                | Assessor's signature: _____  |                                                                  |                                                               |
| Weight: _____ kg                                            | Mid upper arm circ.: _____ cm | Fundal height: _____ cm NA                                      | Fetal heart sound? Yes No NA |                                                                  | Ultrasound done (since visit 4)?<br>Yes (complete "tests") No |
| Since visit 4, have you smoked?<br>No Yes (cigarettes/day): |                               | Since visit 4, have you drunk alcohol?<br>No Yes (drinks/week): |                              | Since visit 4, have you used illegal drugs?<br>No Yes (specify): |                                                               |

**Since your last visit ...**

*(For questions below, write any conditions, treatments, tests in the "medical history", "treatments", and "test results" section opposite)*

|                                                                                                                                           |     |    |    |
|-------------------------------------------------------------------------------------------------------------------------------------------|-----|----|----|
| Have you had malaria?                                                                                                                     | Yes | No | NK |
| Have you taken any treatments to prevent malaria?                                                                                         | Yes | No | NK |
| Have you had any fever other than malaria?                                                                                                | Yes | No | NK |
| Have you had any vaccines?                                                                                                                | Yes | No | NK |
| Have you had any blood transfusions?                                                                                                      | Yes | No | NK |
| Have you had any other injections?                                                                                                        | Yes | No | NK |
| Have you had any other condition (apart from malaria and fever)?                                                                          | Yes | No | NK |
| Have you taken any traditional or herbal medicines?                                                                                       | Yes | No | NK |
| Have you taken any other treatments (including routine treatments - e.g. folic acid, iron supplements, multivitamins, deworming tablets)? | Yes | No | NK |
| Have you had any tests at a clinic (apart from an ultrasound)?                                                                            | Yes | No | NK |

**For midwife to complete:**

*(For questions below, write any treatments and tests prescribed in "medical history" and "test results" section opposite)*

|                                                                                  |     |    |
|----------------------------------------------------------------------------------|-----|----|
| At the clinic today, will this patient be prescribed one or more treatments?     | Yes | No |
| At the clinic today, will this patient be given or prescribed one or more tests? | Yes | No |

**Medical history**

| Condition(complete all "treatments" in section below) | Start/ diagnosis date   | Duration                   | How was condition diagnosed? (tick all that apply) |                   |            |      |                      | Visit reported |
|-------------------------------------------------------|-------------------------|----------------------------|----------------------------------------------------|-------------------|------------|------|----------------------|----------------|
|                                                       | dd mmm yy/ how long ago | days/months/ years/ongoing | Clinical                                           | Smear/ Microscopy | Rapid test | Swab | Other(specify) or NK |                |
|                                                       |                         |                            |                                                    |                   |            |      |                      |                |
|                                                       |                         |                            |                                                    |                   |            |      |                      |                |
|                                                       |                         |                            |                                                    |                   |            |      |                      |                |
|                                                       |                         |                            |                                                    |                   |            |      |                      |                |
|                                                       |                         |                            |                                                    |                   |            |      |                      |                |
|                                                       |                         |                            |                                                    |                   |            |      |                      |                |
|                                                       |                         |                            |                                                    |                   |            |      |                      |                |

**Treatments**

Part I. Routine treatments (Circle all visits during which routine treatments were reported or prescribed)

| Name of treatment                       | Folic Acid         | Iron Supplement    | Folic acid + Iron Supplement | IPTp SP            | Tetanus Toxoid     | Mutivitamin        |
|-----------------------------------------|--------------------|--------------------|------------------------------|--------------------|--------------------|--------------------|
| Date Started<br>dd mmm yy/ how long ago |                    |                    |                              |                    |                    |                    |
| Visits reported/ prescribed             | 1 2 3 4<br>5 6 7 8 | 1 2 3 4<br>5 6 7 8 | 1 2 3 4<br>5 6 7 8           | 1 2 3 4<br>5 6 7 8 | 1 2 3 4<br>5 6 7 8 | 1 2 3 4<br>5 6 7 8 |

Part II. Other treatments

| Name of treatment (complete all corresponding conditions in "medical history section" above) | Indication | Start                   | Duration                               | Route* | Source of information** | Visit reported |
|----------------------------------------------------------------------------------------------|------------|-------------------------|----------------------------------------|--------|-------------------------|----------------|
|                                                                                              |            | dd mmm yy/ how long ago | once, ongoing, # of days/months/ years |        |                         |                |
|                                                                                              |            |                         |                                        |        |                         |                |
|                                                                                              |            |                         |                                        |        |                         |                |
|                                                                                              |            |                         |                                        |        |                         |                |
|                                                                                              |            |                         |                                        |        |                         |                |
|                                                                                              |            |                         |                                        |        |                         |                |
|                                                                                              |            |                         |                                        |        |                         |                |
|                                                                                              |            |                         |                                        |        |                         |                |
|                                                                                              |            |                         |                                        |        |                         |                |
|                                                                                              |            |                         |                                        |        |                         |                |
|                                                                                              |            |                         |                                        |        |                         |                |

\* oral, rectal, injection, nasal, topical, ocular, per vagina \*\*patient report (pt report), facility record (specify), patient's medical diary, other (specify)

**Test results**

| Name of test  | Date dd mmm yy | Result/unit |
|---------------|----------------|-------------|
| Haemoglobin   |                |             |
| Urinalysis    |                |             |
| HIV           |                |             |
| Syphilis/VDRL |                |             |
|               |                |             |
|               |                |             |
|               |                |             |

**Medical history**

| Condition (complete all "treatments" in section below) | Start/ diagnosis date   | Duration                   | How was condition diagnosed? (tick all that apply) |                   |            |      |                       | Visit reported |
|--------------------------------------------------------|-------------------------|----------------------------|----------------------------------------------------|-------------------|------------|------|-----------------------|----------------|
|                                                        | dd mmm yy/ how long ago | days/months/ years/ongoing | Clinical                                           | Smear/ Microscopy | Rapid test | Swab | Other (specify) or NK |                |
|                                                        |                         |                            |                                                    |                   |            |      |                       |                |
|                                                        |                         |                            |                                                    |                   |            |      |                       |                |
|                                                        |                         |                            |                                                    |                   |            |      |                       |                |
|                                                        |                         |                            |                                                    |                   |            |      |                       |                |
|                                                        |                         |                            |                                                    |                   |            |      |                       |                |
|                                                        |                         |                            |                                                    |                   |            |      |                       |                |
|                                                        |                         |                            |                                                    |                   |            |      |                       |                |
|                                                        |                         |                            |                                                    |                   |            |      |                       |                |
|                                                        |                         |                            |                                                    |                   |            |      |                       |                |

**Treatments**

| Name of treatment (complete all corresponding conditions in "medical history section" above) | Indication | Start                   | Duration                   | Route* | Source of information** | Visit reported |
|----------------------------------------------------------------------------------------------|------------|-------------------------|----------------------------|--------|-------------------------|----------------|
|                                                                                              |            | dd mmm yy/ how long ago | days/months/ years/ongoing |        |                         |                |
|                                                                                              |            |                         |                            |        |                         |                |
|                                                                                              |            |                         |                            |        |                         |                |
|                                                                                              |            |                         |                            |        |                         |                |
|                                                                                              |            |                         |                            |        |                         |                |
|                                                                                              |            |                         |                            |        |                         |                |
|                                                                                              |            |                         |                            |        |                         |                |
|                                                                                              |            |                         |                            |        |                         |                |
|                                                                                              |            |                         |                            |        |                         |                |
|                                                                                              |            |                         |                            |        |                         |                |
|                                                                                              |            |                         |                            |        |                         |                |
|                                                                                              |            |                         |                            |        |                         |                |
|                                                                                              |            |                         |                            |        |                         |                |
|                                                                                              |            |                         |                            |        |                         |                |
|                                                                                              |            |                         |                            |        |                         |                |
|                                                                                              |            |                         |                            |        |                         |                |
|                                                                                              |            |                         |                            |        |                         |                |
|                                                                                              |            |                         |                            |        |                         |                |

\* oral, rectal, injection, nasal, topical, ocular, per vagina    \*\*patient report (pt report), other record (specify), diary, other (specify)

**Test results**

| Name of test | Date dd mmm yy | Result/unit |
|--------------|----------------|-------------|
|              |                |             |
|              |                |             |
|              |                |             |
|              |                |             |
|              |                |             |
|              |                |             |
|              |                |             |
|              |                |             |
|              |                |             |
|              |                |             |

**Comments and serious adverse events**

Registry ID: \_\_\_\_\_

Clinic ID: \_\_\_\_\_

**Comments**

| Topic | Comment | Initial/date |
|-------|---------|--------------|
|       |         |              |
|       |         |              |
|       |         |              |
|       |         |              |
|       |         |              |
|       |         |              |
|       |         |              |
|       |         |              |

**Serious adverse events**

|                        |                |             |            |                    |                |       |
|------------------------|----------------|-------------|------------|--------------------|----------------|-------|
| Circle any that apply: | Maternal death | Miscarriage | Stillbirth | Congenital anomaly | Neonatal death | Other |
| Date of SAE:           |                |             |            |                    |                |       |
| Information:           |                |             |            |                    |                |       |
| Circle any that apply: | Maternal death | Miscarriage | Stillbirth | Congenital anomaly | Neonatal death | Other |
| Date of SAE:           |                |             |            |                    |                |       |
| Information:           |                |             |            |                    |                |       |

## Completion guidelines for health-care workers

|                                |                                                                                                                                                                                                                                                                                                                                                                                                                                                                                                                                                                                                                                                                          |
|--------------------------------|--------------------------------------------------------------------------------------------------------------------------------------------------------------------------------------------------------------------------------------------------------------------------------------------------------------------------------------------------------------------------------------------------------------------------------------------------------------------------------------------------------------------------------------------------------------------------------------------------------------------------------------------------------------------------|
| Registry ID                    | [The assignment of registry ID codes will be determined by the Principal Investigator/co-ordinator of the registry in a particular country. The unique ID should facilitate pooling of data across sites and countries.]                                                                                                                                                                                                                                                                                                                                                                                                                                                 |
| Circling answers               | Please indicate the answer to each multiple choice question by circling the correct information.                                                                                                                                                                                                                                                                                                                                                                                                                                                                                                                                                                         |
| Date formats                   | <p>The standard date format is dd mmm yy (e.g. 12<sup>th</sup> February 2009 is 12 FEB 09)</p> <p>If you or the patient does not know part of the date you may put a line in its place. (e.g. -- / ---- / 09)</p> <p>If a date is estimated/guessed then please use ± before the date. (e.g. ± 12 FEB 09)</p> <p>If the you or the patient has approximate knowledge of the timescale only you may use x days ago, x weeks ago, x months ago, x years ago (e.g. 6 weeks ago)</p> <p>Duration: leave the duration section blank until you know it. If a medical condition or treatment is ongoing at the time of delivery please write “ongoing” in the duration box.</p> |
| Abbreviations                  | You may use well known abbreviations e.g. NK for not known, ND for not done, NA for not applicable. Otherwise write in full.                                                                                                                                                                                                                                                                                                                                                                                                                                                                                                                                             |
| Questions to patients          | Questions are to be asked of the patients as they are written. You will then follow the instructions and complete the relevant section.                                                                                                                                                                                                                                                                                                                                                                                                                                                                                                                                  |
| Medical history, treatments    | One line per item please unless an illness or treatment was stopped and then started again. Please indicate if illness/treatments were intermittent and then give the overall start and stop dates as above.                                                                                                                                                                                                                                                                                                                                                                                                                                                             |
| Information from other Sources | If you find any information from another source such as another clinic record form, diary, notes etc. please complete the registry as fully as possible.                                                                                                                                                                                                                                                                                                                                                                                                                                                                                                                 |
| Run out of space?              | If you run out of space there is an extra page for medical history, treatments and tests.                                                                                                                                                                                                                                                                                                                                                                                                                                                                                                                                                                                |
| Serious Adverse Events (SAEs)  | In certain circumstances expedited reporting of SAEs may be warranted. Then, in the event of an SAE (e.g. death, hospitalization, permanent damage or disability of mother or neonate, miscarriage, stillbirth, congenital anomaly, life-threatening events, including neonatal resuscitation) please complete the section on ‘Extra Page & Comments’. Also, please alert the PI of the SAE and send any accompanying photographs within 24 hours.                                                                                                                                                                                                                       |
| Comments section               | This is for additional relevant information or if you really don’t know where to record something. Please use it sparingly.                                                                                                                                                                                                                                                                                                                                                                                                                                                                                                                                              |

Thank you for your help with this important project and good luck!
